# Supplementary material for: Copper(ii) and zinc(ii) dependent effects on Aβ42 aggregation: a CD, Th-T and SFM study
Source: Royal Society of Chemistry journal article supplement (doi:10.1039/c3nj40999f), 2013-01-01
Supplement: c3nj40999f.pdf [file c3nj40999f.pdf]

## SUPPLEMENTARY INFORMATION

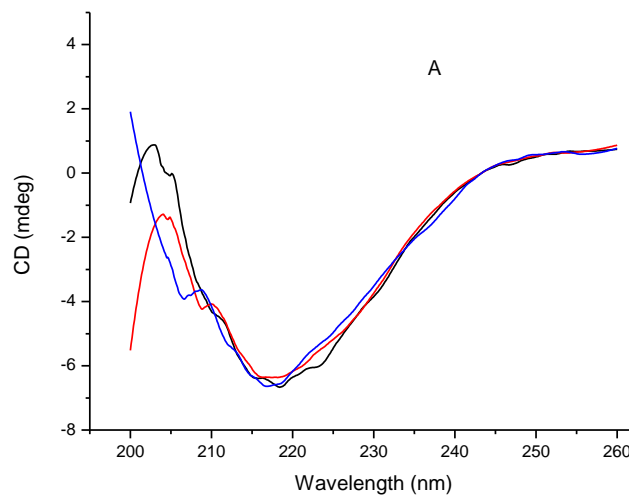

5

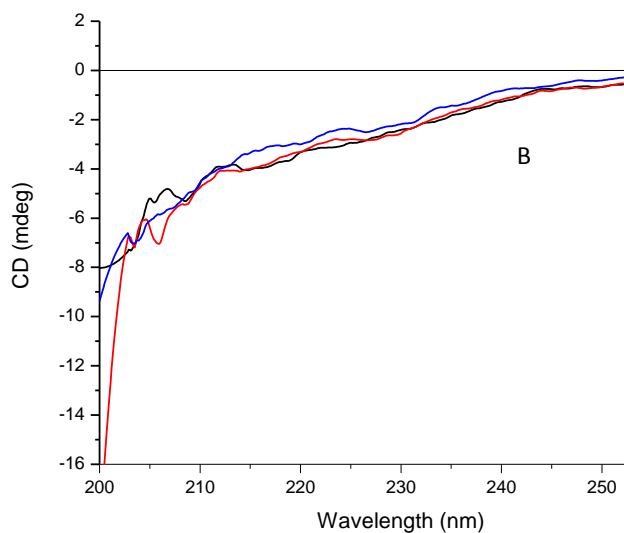

10 Figure S1. CD spectra of three independent freshly ( $t=0$ )  $A\beta_{42}$  samples prepared according to procedure A (A) or B (B).

15

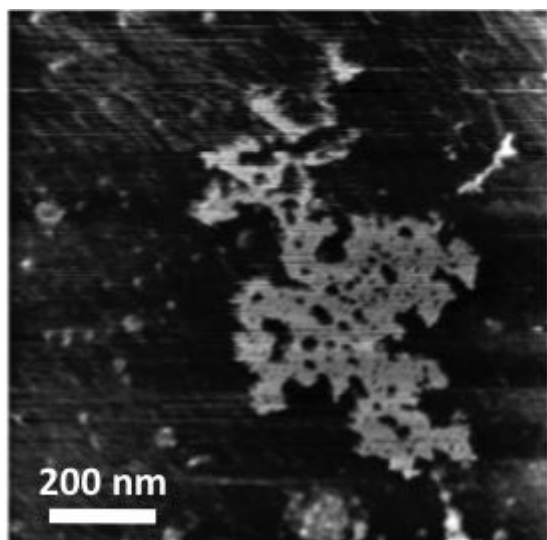

5 Figure S2. Magnification of the box marked SFM image in Figure 3a).

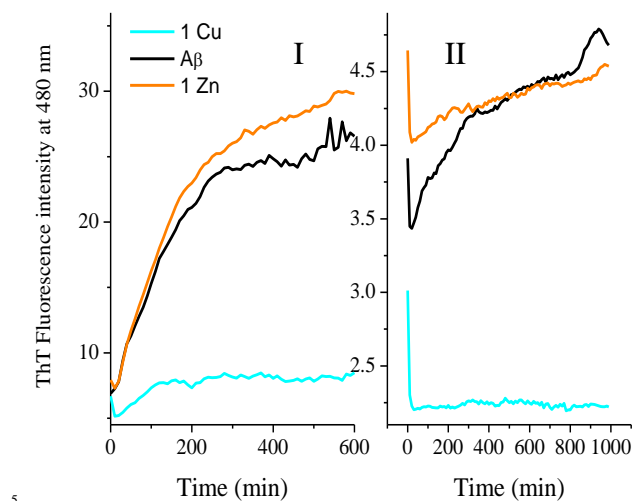

5

Figure S3. Fiber growth curves of Aβ<sub>42</sub> 15 μM in 2 mM NEM/10 mM Na<sub>2</sub>SO<sub>4</sub> in the absence and in the presence of Cu or Zn ions at a 1:1 metal to peptide molar ratio. Aβ samples were prepared according to procedure B (I) or A (II).

10

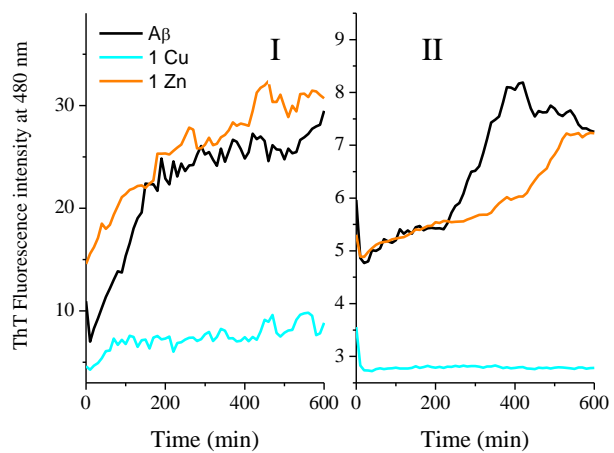

Figure S4. Fiber growth curves of Aβ42 15 μM in aCSF in  
s the absence and in the presence of Cu or Zn ions at a 1:1  
metal to peptide molar ratio. Aβ samples were prepared  
according to procedure B (I) or A (II).
